# Supplementary material for: Calculation of Oxygen Uptake during Ambulatory Cardiac Rehabilitation
Source: MDPI journal article supplement (doi:10.3390/jcm13082235), 2024-04-12
Supplement: s1 [file s1]

**Table S1.** Comparison of measured oxygen uptake values with estimated values at fixed work rates (100 watts, n = 83; 55% peak WR, n = 91).

| Pre                  |                              |           |           | Comparisons                            | Post                 |                              |           |           |
|----------------------|------------------------------|-----------|-----------|----------------------------------------|----------------------|------------------------------|-----------|-----------|
| Mean VO <sub>2</sub> | MD<br>(l·min <sup>-1</sup> ) | Upper LoA | Lower LoA |                                        | Mean VO <sub>2</sub> | MD<br>(l·min <sup>-1</sup> ) | Upper LoA | Lower LoA |
| 1.41                 | -0.03                        | 0.30      | -0.36     | VO <sub>2</sub> vs. ROT 100 watt       | 1.44                 | 0.00                         | 0.31      | -0.32     |
|                      | -0.31                        | 0.03      | -0.64     | VO <sub>2</sub> vs. ACSM 100 watt      |                      | -0.28                        | 0.04      | -0.60     |
|                      | 0.03                         | 0.36      | -0.31     | VO <sub>2</sub> vs. FRIEND 100 watt    |                      | 0.05                         | 0.37      | -0.27     |
| 1.17                 | -0.01                        | 0.26      | -0.29     | VO <sub>2</sub> vs. ROT 55% peak WR    | 1.28                 | 0.00                         | 0.37      | -0.36     |
|                      | -0.27                        | 0.02      | -0.55     | VO <sub>2</sub> vs. ACSM 55% peak WR   |                      | -0.26                        | 0.10      | -0.62     |
|                      | 0.06                         | 0.34      | -0.22     | VO <sub>2</sub> vs. FRIEND 55% peak WR |                      | 0.07                         | 0.43      | -0.29     |

MD: mean of the differences; LoA: limit of agreement; VO<sub>2</sub>: oxygen uptake; VO<sub>2c</sub>: oxygen uptake determined with equation; WR: work rate; ROT: rules of thumb; ACSM: American College of Sports Medicine; FRIEND: Fitness Registry and the Importance of Exercise National Database

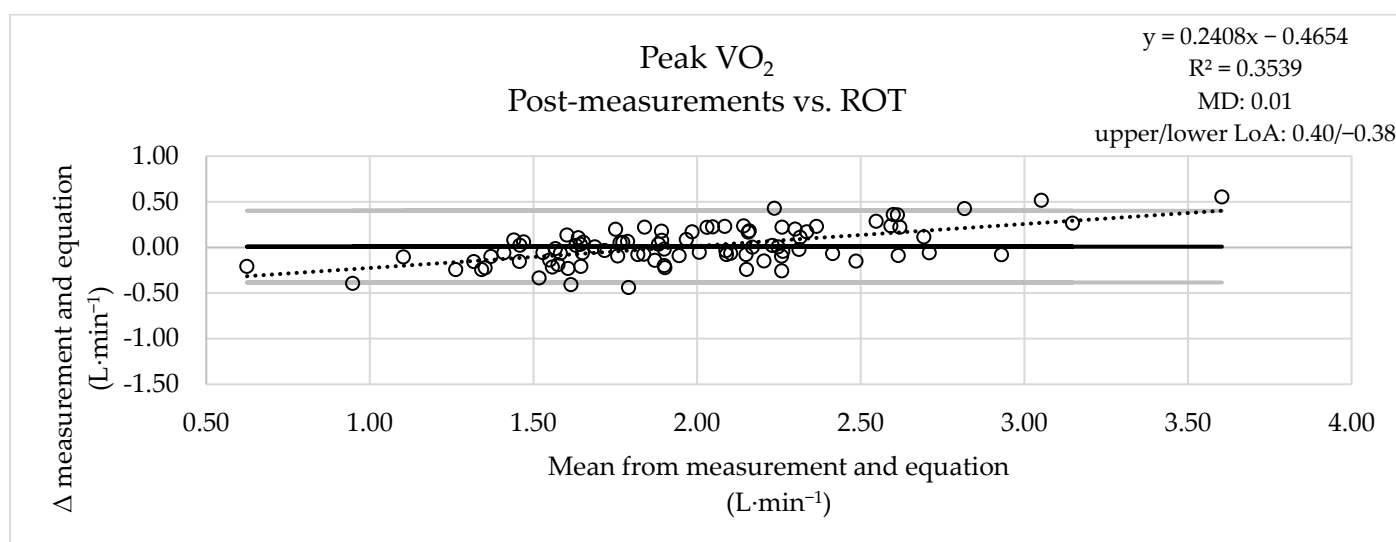

**Figure S1.** Graphical comparison of the oxygen uptake values of the post-testings with the ROT combination results (n = 91). VO<sub>2</sub>: oxygen uptake; ROT: rules of thumb; upper solid line: upper limit of agreement (LoA); middle solid line: mean of differences (MD) between measurements and equation results; lower solid line: lower limit of agreement; dashed line: linear trend (y: equation to the line; R<sup>2</sup>: determination coefficient).

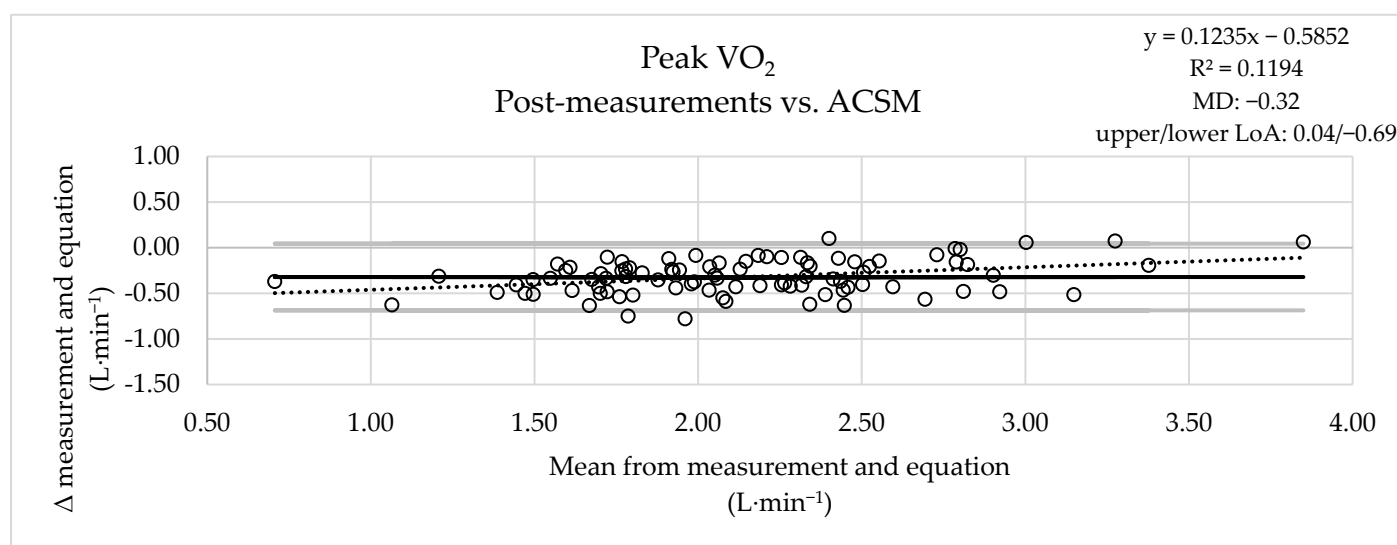

**Figure S2.** Graphical comparison of the oxygen uptake values of the post-testings with ACSM equation results (n = 91). VO<sub>2</sub>: oxygen uptake; ACSM: American College of Sports Medicine; upper solid line: upper limit of agreement (LoA); middle solid line: mean of differences (MD) between measurements and equation results; lower solid line: lower limit of agreement; dashed line: linear trend (y: equation to the line; R<sup>2</sup>: determination coefficient).

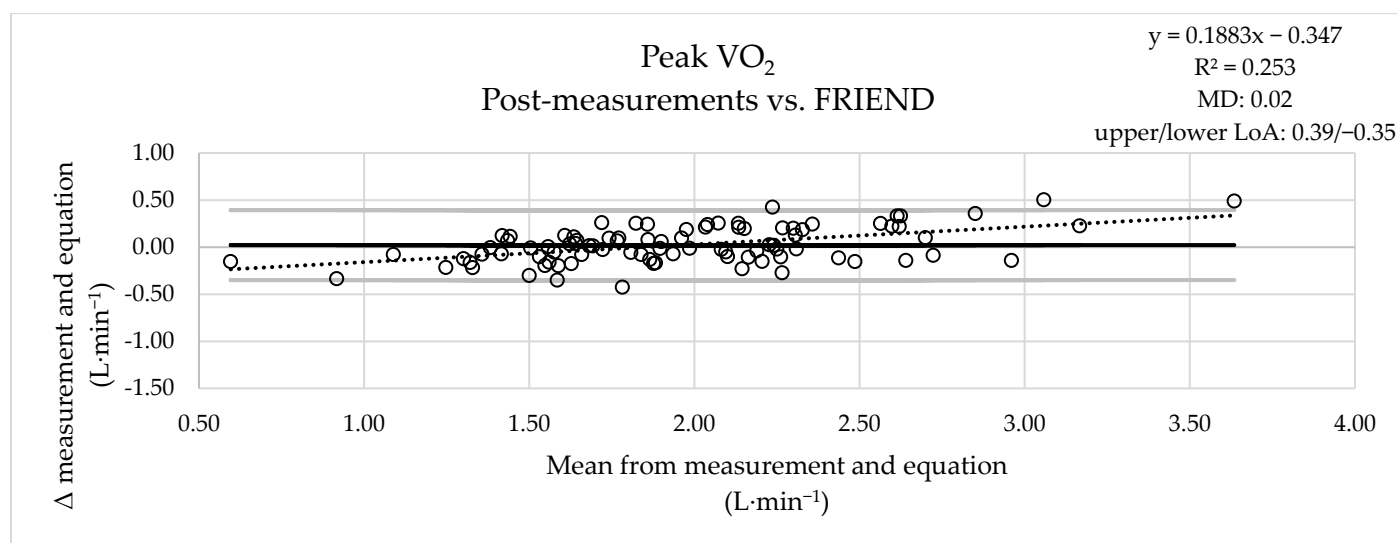

**Figure S3.** Graphical comparison of the oxygen uptake values of the post-testings with FRIEND equation results (n = 91). VO<sub>2</sub>: oxygen uptake; FRIEND: Fitness Registry and the Importance of Exercise National Database; upper solid line: upper limit of agreement (LoA); middle solid line: mean of differences (MD) between measurements and equation results; lower solid line: lower limit of agreement; dashed line: linear trend (y: equation to the line; R<sup>2</sup>: determination coefficient).
